# Supplementary material for: Thermally activated asymmetric structural recovery in a soft glassy nano-clay suspension
Source: Royal Society of Chemistry journal article supplement (doi:10.1039/c3sm51378e), 2013-01-01
Supplement: c3sm51378e.pdf [file c3sm51378e.pdf]

# **Supplementary Information**

## **Thermally Activated Asymmetric Structural Recovery in a Soft Glassy Nano-Clay Suspension**

Tanmay P. Dhavale, Shweta Jatav and Yogesh M Joshi\*

Department of Chemical Engineering, Indian Institute of Technology Kanpur,  
Kanpur 208016. INDIA.

\* E-Mail: [joshi@iitk.ac.in](mailto:joshi@iitk.ac.in)

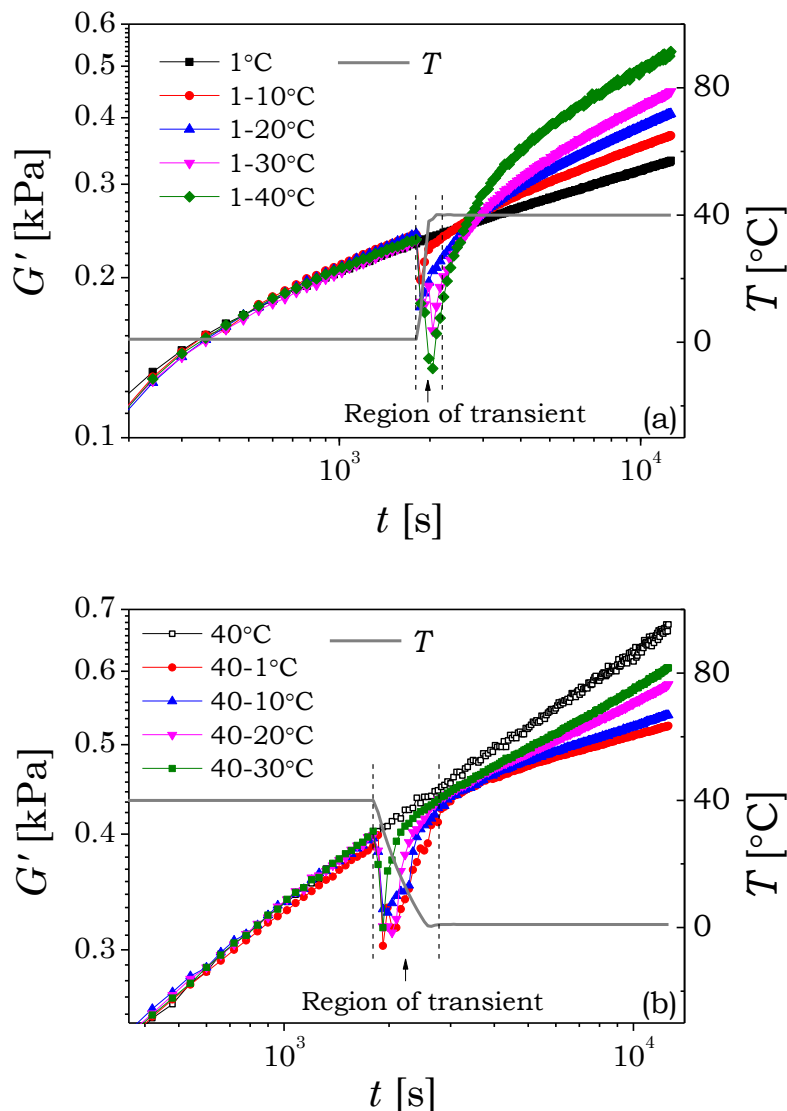

**Figure S1.** Raw data of  $G'$  evolution upon temperature step up (a), and step down (b) jump for Laponite suspension. The corresponding change in temperature for one case each is also plotted in the respective figures. It can be seen that time required to overcome transient in temperature decrease ( $\approx 1000$  s) is higher than that required for temperature increase ( $\approx 300$  s). During such transients, since properties of the material change rapidly over a duration of a single cycle to monitor  $G'$ , response ceases to be harmonic. This induces errors in the estimation of  $G'$ . Therefore we have completely omitted the data associated with the transient in the manuscript.
